# Supplementary material for: Effect of enzymatic saccharification on edible seaweed (Ulva sp.) fermentation
Source: Research Square preprint supplement (doi:10.21203/rs.3.rs-8533144/v1), 2026-02-04
Supplement: Supplementary file 1 [file 482fd803cb87a796a40d49b2.pdf]

## Supplementary Material

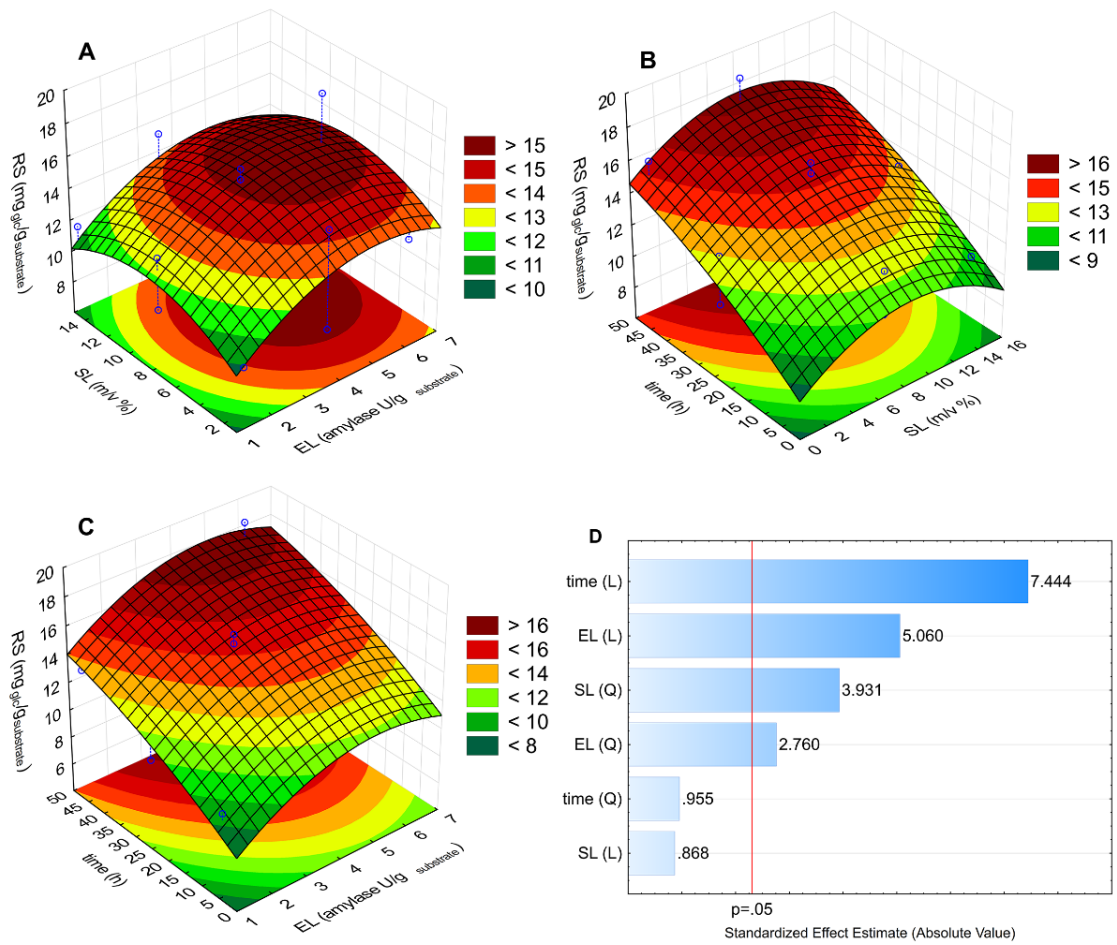

**Figure S1** Optimization of *Ulva* sp. saccharification using *Aspergillus oryzae*-fermented *Ulva* sp. extract (CE), represented in three-dimensional surface response plots of the effect of (A) substrate load and enzymatic load, (B) time and substrate load, and (C) time and enzymatic load on the concentration of reducing sugars (RS) (mg<sub>Glu</sub>/g<sub>substrate</sub>). The Pareto analysis chart (D) demonstrates the significance, either linear "L" or quadratic "Q", of each factor.

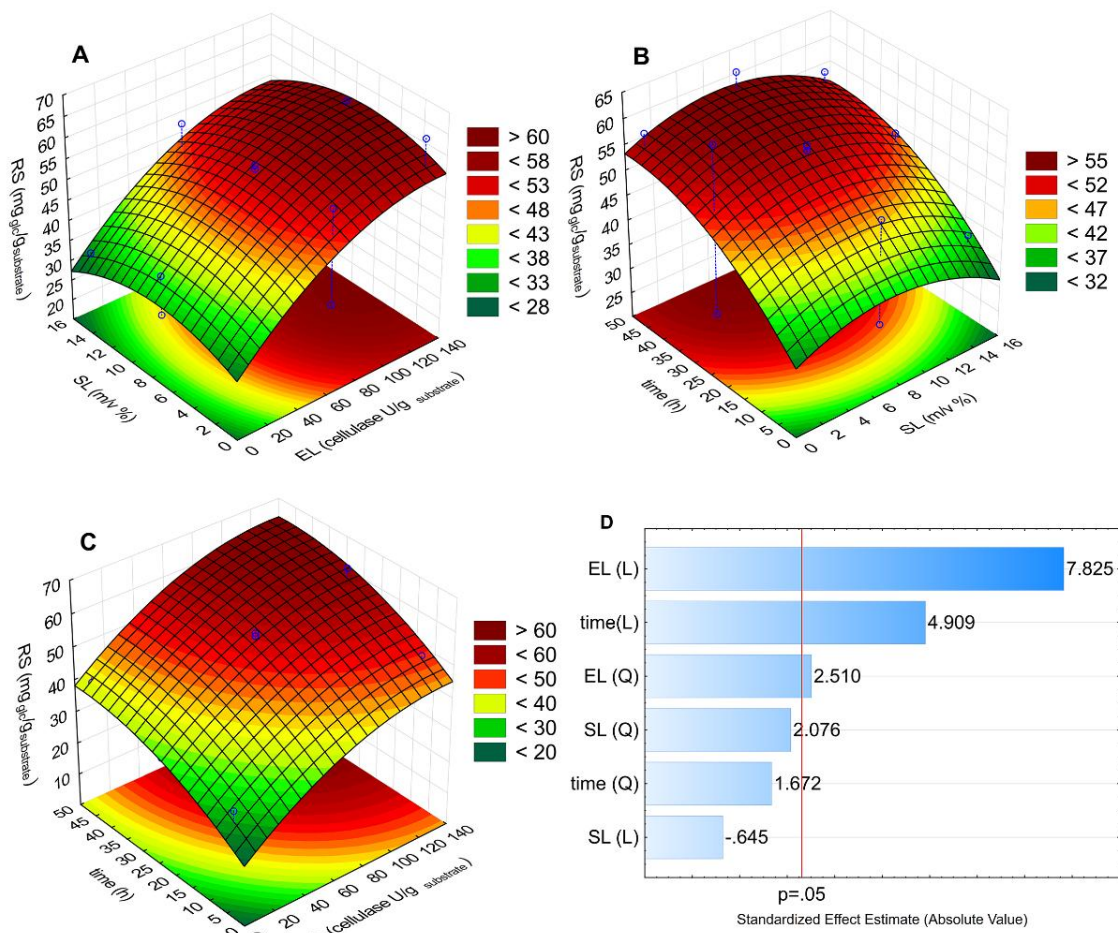

**Figure S2** Optimization of *Ulva* sp. saccharification using the cellulolytic enzymatic cocktail (CC), represented in three-dimensional surface response plots of the effect of (A) substrate load and enzymatic load, (B) time and substrate load, and (C) time and enzymatic load on the concentration of reducing sugars (RS) (mg<sub>Glu</sub>/g<sub>substrate</sub>). The Pareto analysis chart (D) demonstrates the significance, either linear "L" or quadratic "Q", of each factor.

**Table S1** Independent variables (factors) and their levels used in the RSM optimization of the enzymatic saccharification of *Ulva sp.* using i) crude extract from the *A. oryzae* fermentation (CE), ii) a commercial cellulolytic cocktail (CC), and iii) the combination of both (CE+CC). Factors included substrate load (SL), enzymatic load (EL), and reaction time. Sets were performed sequentially, with modifications performed in between highlighted in bold.

|               |                                               | Factor levels |           |            |
|---------------|-----------------------------------------------|---------------|-----------|------------|
|               |                                               | Minimum       | Midpoint  | Maximum    |
| Set 1 (CE)    | SL (m/v %)                                    | 1             | 8         | 15         |
|               | EL (amylase U/g <sub>substrate</sub> )        | 1.2           | 3.6       | 6          |
|               | Time (h)                                      | 6             | 27        | 48         |
| Set 2 (CC)    | SL (m/v %)                                    | 1             | 8         | 15         |
|               | <b>EL (cellulase U/g<sub>substrate</sub>)</b> | <b>7</b>      | <b>70</b> | <b>133</b> |
|               | Time (h)                                      | 6             | 27        | 48         |
| Set 3 (CE+CC) | SL (m/v %)                                    | 1             | 8         | 15         |
|               | EL (cellulase U/g <sub>substrate</sub> )      | 7             | 70        | 133        |
|               | <b>Time (h)</b>                               | <b>6</b>      | <b>39</b> | <b>72</b>  |

**Table S2** Design of experiment for Set 3 (CE+CC) of the RSM optimization of the enzymatic saccharification of *Ulva* sp. (EL) enzymatic load is represented in cellulase U/g substrate, (SL) substrate load is represented as % (m/v), time is represented in hours.

| Run Nr | EL  | SL | Time | Cellulase (uL) | $\beta$ -glucosidase (uL) | Alcalase (mL) | Aspergillus extract (mL) | Buffer (mL) | Seaweed mass (g) |
|--------|-----|----|------|----------------|---------------------------|---------------|--------------------------|-------------|------------------|
| 1      | 7   | 1  | 27   | 5              | 0.5                       | 0.3           | 0.1                      | 49.6        | 0.5              |
| 2      | 133 | 1  | 27   | 95             | 9.5                       | 0.3           | 0.5                      | 49.1        | 0.5              |
| 3      | 7   | 15 | 27   | 75             | 7.5                       | 4.43          | 1.5                      | 44          | 7.5              |
| 4      | 133 | 15 | 27   | 1,425          | 142.5                     | 4.43          | 7.5                      | 36.5        | 7.5              |
| 5      | 7   | 8  | 6    | 40             | 4                         | 2.33          | 0.8                      | 46.8        | 4                |
| 6      | 133 | 8  | 6    | 760            | 76                        | 2.33          | 4                        | 42.8        | 4                |
| 7      | 7   | 8  | 48   | 40             | 4                         | 2.33          | 00.8                     | 46.8        | 4                |
| 8      | 133 | 8  | 48   | 760            | 76                        | 2.33          | 4                        | 42.8        | 4                |
| 9      | 70  | 1  | 6    | 50             | 5                         | 0.3           | 0.3                      | 49.3        | 0.5              |
| 10     | 70  | 15 | 6    | 750            | 75                        | 4.43          | 4.5                      | 40.2        | 7.5              |
| 11     | 70  | 1  | 48   | 50             | 5                         | 0.3           | 0.3                      | 49.3        | 0.5              |
| 12     | 70  | 15 | 48   | 750            | 75                        | 4.43          | 4.5                      | 40.2        | 7.5              |
| 13     | 70  | 8  | 27   | 400            | 40                        | 2.33          | 2.4                      | 44.8        | 4                |
| 14     | 70  | 8  | 27   | 400            | 40                        | 2.33          | 2.4                      | 44.8        | 4                |
| 15     | 70  | 8  | 27   | 400            | 40                        | 2.33          | 2.4                      | 44.8        | 4                |

**Table S3** Equations and goodness-of-fit statistical parameters for the modelling of reducing sugar concentration (RS)(mg<sub>glc</sub>/g<sub>substrate</sub>) as a function of the tested factors (enzymatic load (EL), substrate load (SL) and time (t)) for each extract. Statistical parameters presented are the overall correlation coefficient (R<sup>2</sup>) and *p*-value.

| Extract | Equations                                                                    | R <sup>2</sup> | <i>p</i> -value |
|---------|------------------------------------------------------------------------------|----------------|-----------------|
| CE      | $\Delta RS = 6.757 + 2.415 (EL) - 0.237 (EL^2) + 0.677 (SL) - 0.040 (SL^2)$  | 0.9283         | 0.0852          |
|         | $\Delta RS = 8.383 + 0.677 (SL) - 0.040 (SL^2) - 0.177 (t) - 0.001 (t^2)$    |                |                 |
|         | $\Delta RS = 5.633 + 2.415 (EL) - 0.237 (EL^2) - 0.177 (t) - 0.001 (t^2)$    |                |                 |
| CC      | $\Delta RS = 29.453 + 0.385 (EL) - 0.001 (EL^2) + 1.370 (SL) - 0.094 (SL^2)$ | 0.9241         | 0.0231          |
|         | $\Delta RS = 33.802 + 1.370 (SL) - 0.094 (SL^2) + 0.809 (t) - 0.008 (t^2)$   |                |                 |
|         | $\Delta RS = 18.161 + 0.385 (EL) - 0.001 (EL^2) + 0.809 (t) - 0.008 (t^2)$   |                |                 |
| CE+CC   | $\Delta RS = 41.505 + 0.259 (EL) - 0.001 (EL^2) + 2.438 (SL) - 0.148 (SL^2)$ | 0.9568         | 0.0002          |
|         | $\Delta RS = 38.418 + 2.438 (SL) - 0.148 (SL^2) + 0.711 (t) - 0.006 (t^2)$   |                |                 |
|         | $\Delta RS = 32.813 + 0.259 (EL) - 0.001 (EL^2) + 0.711 (t) - 0.006 (t^2)$   |                |                 |
